# Supplementary material
Source: ML conference proceedings conference paper supplement (https://openreview.net/forum?id=qH9nrMNTIW)
Supplement: supplementary_material [file attachment]

# README

## Reproduce evaluation results in Table 2.

### 1. Installation

| Package           | Version   |
|-------------------|-----------|
| Python            | 3.8       |
| PyTorch           | 1.10.1    |
| CUDA              | 11.3      |
| PyTorch Geometric | 2.0.4     |
| RDKit             | 2022.03.5 |

Create the conda enviroment:

```
cd ./ipdiff
conda env create -f ipdiff.yaml
# For Vina Docking
pip install meeko==0.1.dev3 scipy pdb2pqr vina==1.2.2
python -m pip install git+https://github.com/Valdes-Tresanco-MS/AutoDockTools_py3
```

### 2. Evaluation from sampled results (.pt)

#### a. Dataset preparation

The data used for evaluation are organized in the Google Drive folder ([https://drive.google.com/drive/folders/1j21cc7-97TedKh\\_El5E34yI8o5ckI7eK?usp=share\\_link](https://drive.google.com/drive/folders/1j21cc7-97TedKh_El5E34yI8o5ckI7eK?usp=share_link)), which is provided by TargetDiff.

```
https://drive.google.com/drive/folders/1j21cc7-97TedKh_El5E34yI8o5ckI7eK?usp=share_link
```

#### b. Evaluate the sampled molecule ligands of IPDiff

Evaluation results in Table2.

Table 2: Summary of different properties of reference molecules and molecules generated by our model and other non-diffusion (Non-Diff.) and diffusion-based (Diff.) baselines. ( $\uparrow$ ) / ( $\downarrow$ ) denotes a larger / smaller number is better. Top 2 results are highlighted with **bold text** and underlined text, respectively.

| Methods              |               | Vina Score ( $\downarrow$ ) |              | Vina Min ( $\downarrow$ ) |              | Vina Dock ( $\downarrow$ ) |              | High Affinity ( $\uparrow$ ) |              | QED ( $\uparrow$ ) |             | SA ( $\uparrow$ ) |             | Diversity ( $\uparrow$ ) |             |
|----------------------|---------------|-----------------------------|--------------|---------------------------|--------------|----------------------------|--------------|------------------------------|--------------|--------------------|-------------|-------------------|-------------|--------------------------|-------------|
|                      |               | Avg.                        | Med.         | Avg.                      | Med.         | Avg.                       | Med.         | Avg.                         | Med.         | Avg.               | Med.        | Avg.              | Med.        | Avg.                     | Med.        |
| Reference            |               | -6.36                       | -6.46        | -6.71                     | -6.49        | -7.45                      | -7.26        | -                            | -            | 0.48               | 0.47        | 0.73              | 0.74        | -                        | -           |
| Comp. with Non-Diff. | LiGAN         | -                           | -            | -                         | -            | -6.33                      | -6.20        | 21.1%                        | 11.1%        | 0.39               | 0.39        | 0.59              | 0.57        | 0.66                     | 0.67        |
|                      | GraphBP       | -                           | -            | -                         | -            | -4.80                      | -4.70        | 14.2%                        | 6.7%         | 0.43               | 0.45        | 0.49              | 0.48        | <b>0.79</b>              | <b>0.78</b> |
|                      | AR            | <u>-5.75</u>                | <u>-5.64</u> | -6.18                     | <u>-5.88</u> | -6.75                      | -6.62        | 37.9%                        | 31.0%        | 0.51               | 0.50        | <u>0.63</u>       | <u>0.63</u> | 0.70                     | 0.70        |
|                      | Pocket2Mol    | -5.14                       | -4.70        | <u>-6.42</u>              | -5.82        | <u>-7.15</u>               | <u>-6.79</u> | 48.4%                        | <u>51.0%</u> | <b>0.56</b>        | <b>0.57</b> | <b>0.74</b>       | <b>0.75</b> | 0.69                     | 0.71        |
|                      | <b>IPDIFF</b> | <b>-6.42</b>                | <b>-7.01</b> | <b>-7.45</b>              | <b>-7.48</b> | <b>-8.57</b>               | <b>-8.51</b> | <b>69.5%</b>                 | <b>75.5%</b> | <u>0.52</u>        | <u>0.53</u> | 0.61              | 0.59        | <u>0.74</u>              | <u>0.73</u> |
| Comp. with Diff.     | TargetDiff    | -5.47                       | <u>-6.30</u> | -6.64                     | -6.83        | -7.80                      | -7.91        | 58.1%                        | 59.1%        | <u>0.48</u>        | <u>0.48</u> | <u>0.58</u>       | 0.58        | <u>0.72</u>              | <u>0.71</u> |
|                      | DecompDiff    | <u>-5.67</u>                | -6.04        | <u>-7.04</u>              | <u>-7.09</u> | <u>-8.39</u>               | <u>-8.43</u> | <u>64.4%</u>                 | <u>71.0%</u> | 0.45               | 0.43        | <b>0.61</b>       | <b>0.60</b> | 0.68                     | 0.68        |
|                      | <b>IPDIFF</b> | <b>-6.42</b>                | <b>-7.01</b> | <b>-7.45</b>              | <b>-7.48</b> | <b>-8.57</b>               | <b>-8.51</b> | <b>69.5%</b>                 | <b>75.5%</b> | <b>0.52</b>        | <b>0.53</b> | <b>0.61</b>       | <u>0.59</u> | <b>0.74</b>              | <b>0.73</b> |

The sampled molecule ligands of IPDiff (Table 2.) are provided in the directory:

```
./sampled_results_ipdiff_official
```

## step 1. run the following command for evaluation

```
conda activate ipdiff
cd ./ipdiff
python eval.py --eval_start_index 0 --eval_end_index 99 --docking_mode vina_dock --
protein_root ./crossdocked_v1.1_rmsd1.0 --sampled_results_path
./sampled_results_ipdiff_official --eval_result_path ./eval_results_ipdiff
```

### For Vina Docking

The '**docking\_mode**' can be chosen from {'none', 'vina\_score', 'vina\_dock'}

**none**: QED, SA only;

**vina score**: QED + SA + vina score + vina min; (faster)

**vina dock**: QED + SA + vina score + vina min + vina dock. (slower)

And in our paper, we select the vina\_dock for the evaluation, the evaluation results are present in Table 2.

**⚠ Note**: It will take some time to prepare pqdqt and pqr files when you run the evaluation code with vina\_score/vina\_dock docking mode for the first time. And we provide the evaluated results in the directory:

```
./eval_results_ipdiff_official
```

## step 2 (optional). calculate the overall evaluation results

If you evaluate the sampled results separately, you can run the following command for calculating the overall results.

```
cd ./ipdiff
python cal_overall_eval_results.py --eval_result_path ./eval_results_ipdiff --
docking_mode vina_dock
```

Or you can run the following command for calculating the overall metrics of provided evaluation results:

```
cd ./ipdiff
python cal_overall_eval_results.py --eval_result_path ./eval_results_ipdiff_official --
docking_mode vina_dock
```

## 3. Training and inference code

---

We are committed to open sourcing the train/inference code upon paper acceptance.
